# Supplementary material for: Selected Class of Enamides Bearing Nitro Functionality as Dual-Acting with Highly Selective Monoamine Oxidase-B and BACE1 Inhibitors
Source: MDPI journal article supplement (doi:10.3390/molecules26196004), 2021-10-03

# Supplementary Information

Article

## Selected Class of Enamides Bearing Nitro Pharmacophore as Dual-Acting with Highly Selective Monoamine Oxidase-B and BACE-1 Inhibitors

Anusree Venkidath <sup>1,†</sup>, Jong Min Oh <sup>2,†</sup>, Sanal Dev <sup>1,\*</sup>, Elham Amin <sup>3,4</sup>, Shebina P. Rasheed <sup>1</sup>, Ajeesh Vengamthodi <sup>1</sup>, Nicola Gambacorta <sup>5</sup>, Ahmed Khames <sup>6</sup>, Mohamed A. Abdelgawad <sup>7</sup>, Ginson George <sup>8</sup>, Orazio Nicolotti <sup>5</sup>, Hoon Kim <sup>2,\*</sup> and Bijo Mathew <sup>8,\*</sup>

<sup>1</sup> Centre for Experimental Drug Design and Development, Department of Pharmaceutical Chemistry, Al-Shifa College of Pharmacy, Perinthalmanna 679325, India; anusreekousthubham96@gmail.com (A.V.); shebinaniz@gmail.com (S.P.R.); ajeeshvengan@hotmail.com (A.V.)

<sup>2</sup> Department of Pharmacy, and Research Institute of Life Pharmaceutical Sciences, Suncheon National University, Suncheon 57922, Korea; 1205027@s.scnu.ac.kr

<sup>3</sup> Department of Medicinal Chemistry and Pharmacognosy, College of Pharmacy, Qassim University, Buraidah 52571, Saudi Arabia; elham\_bns@yahoo.com (E.A.)

<sup>4</sup> Department of Pharmacognosy, Faculty of Pharmacy, Beni-Suef University, Beni-Suef 62514, Egypt

<sup>5</sup> Dipartimento di Farmacia-Scienze del Farmaco, Università degli Studi di Bari "Aldo Moro," via E. Orabona, 4, I-70125 Bari, Italy; nicola.gambacorta1@uniba.it (N.G.); orazio.nicolotti@uniba.it (O.N.)

<sup>6</sup> Department of Pharmaceutics and Industrial Pharmacy, College of Pharmacy, Taif University, P.O. Box-11099, Taif 21944, Saudi Arabia; a.khamies@tu.edu.sa

<sup>7</sup> Department of Pharmaceutical Chemistry, College of Pharmacy, Jouf University, Sakaka 72341, Saudi Arabia; mhmdgwd@ju.edu.sa

<sup>8</sup> Department of Pharmaceutical Chemistry, Amrita School of Pharmacy, Amrita Vishwa Vidyapeetham, AIMS Health Sciences Campus, Kochi 682 041, India; ginsongeorge239@gmail.com

\* Correspondence: sanaldev@gmail.com (S.D.); hoon@suncheon.ac.kr (H.K.); bijovilaventgu@gmail.com or bijomathew@aims.amrita.edu (B.M.)

† These authors contributed equally.

### 3-(4-Nitrophenyl)-*N*-phenylacrylamide (NEA1)

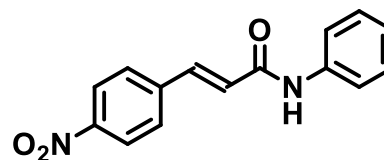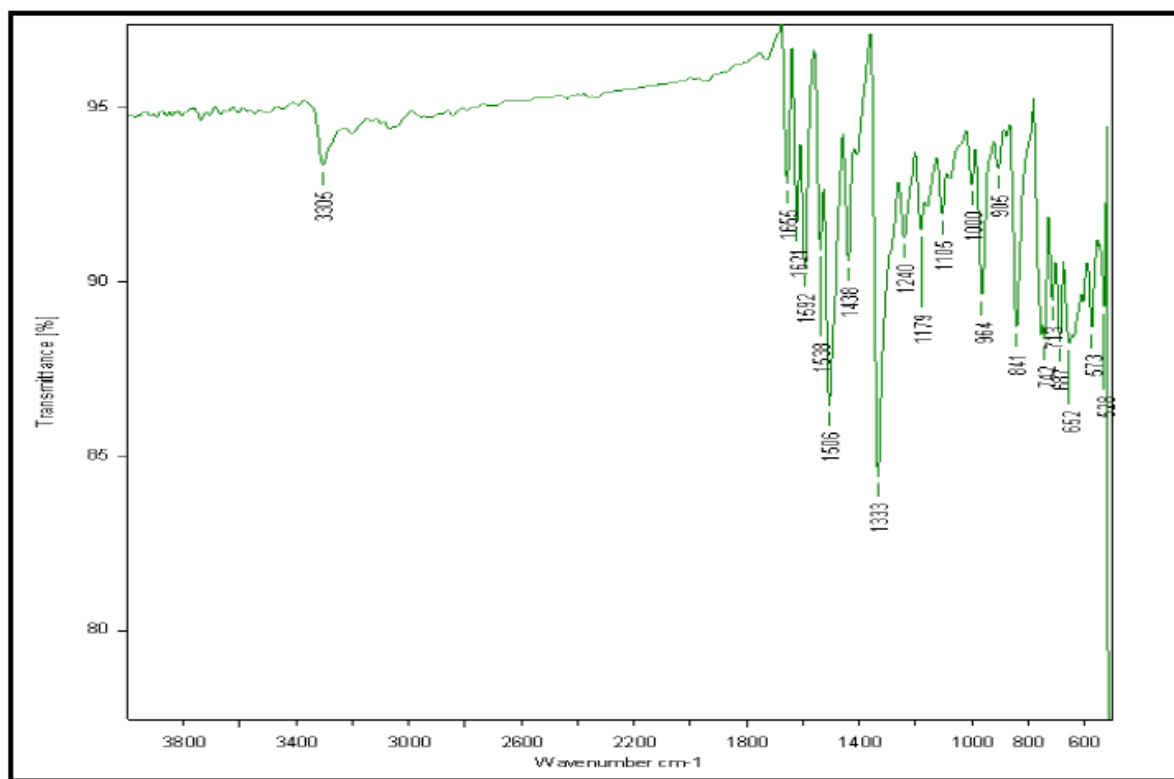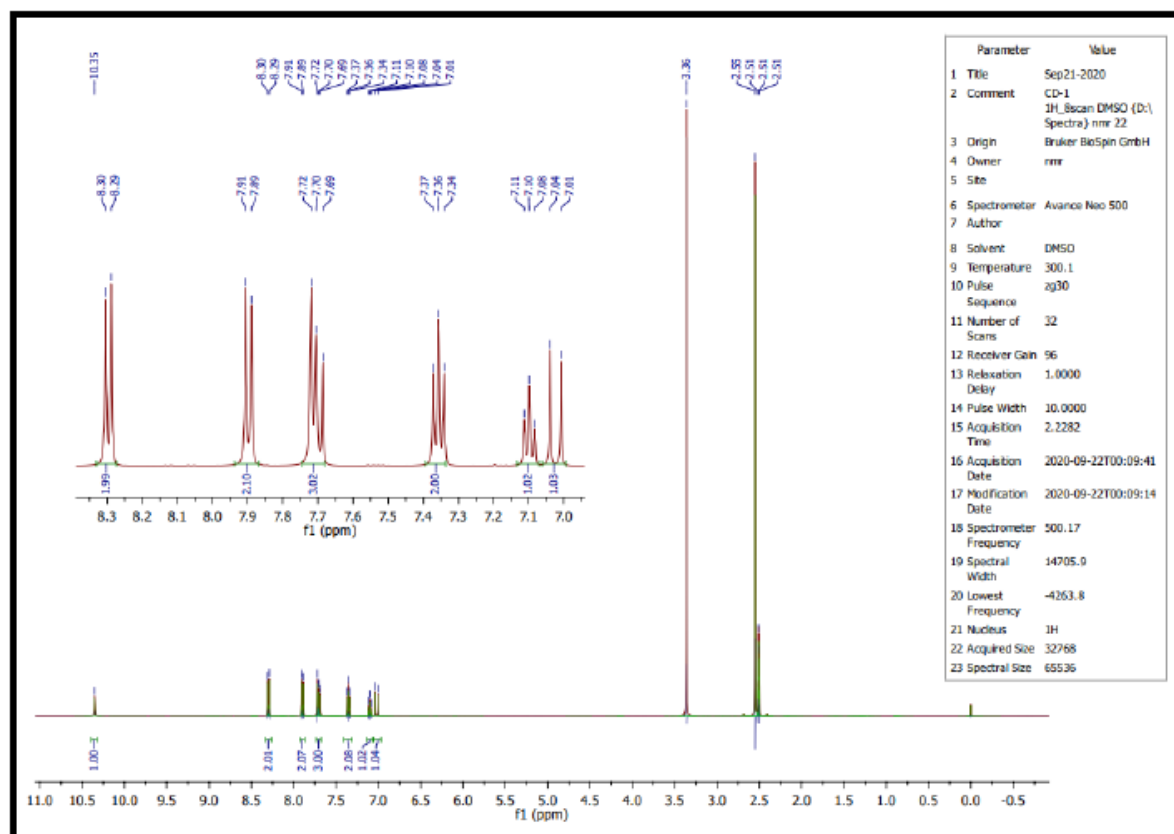

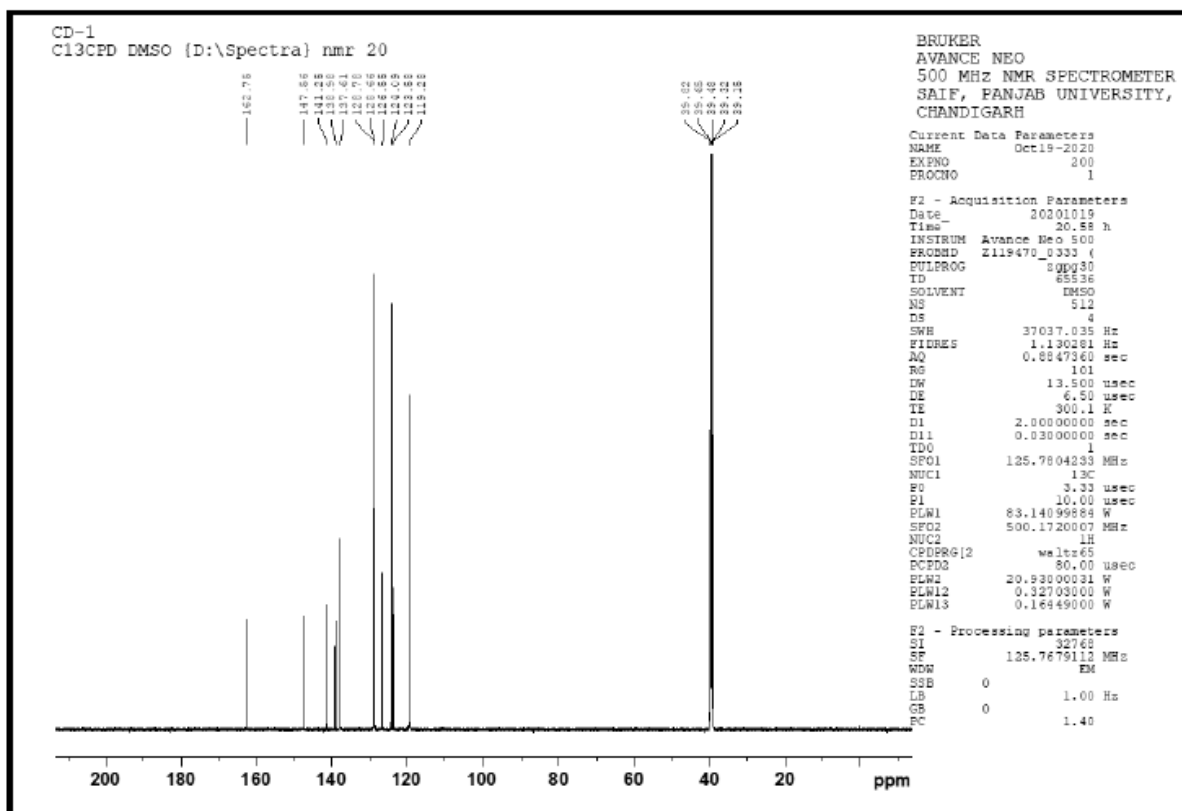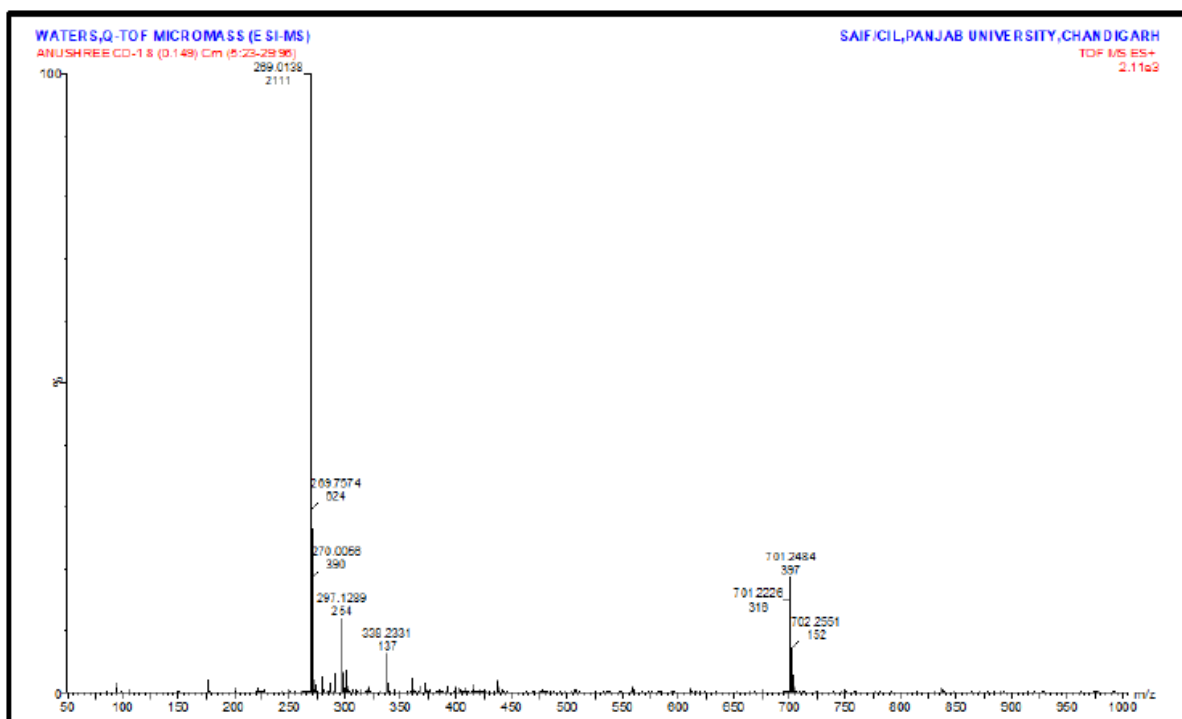

***N*-(4-Chlorophenyl)-3-(4-nitrophenyl)acrylamide (NEA2)**

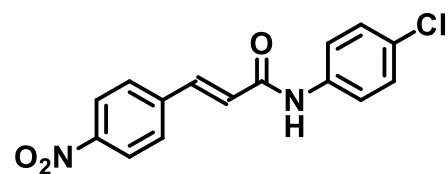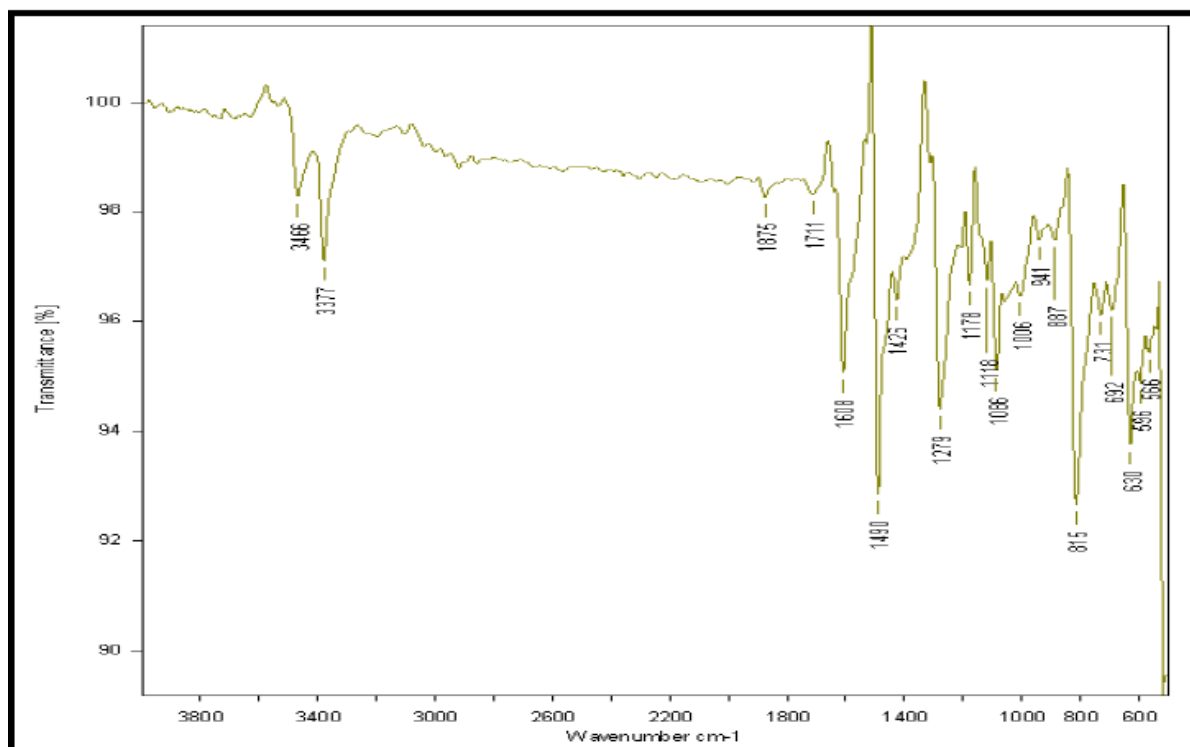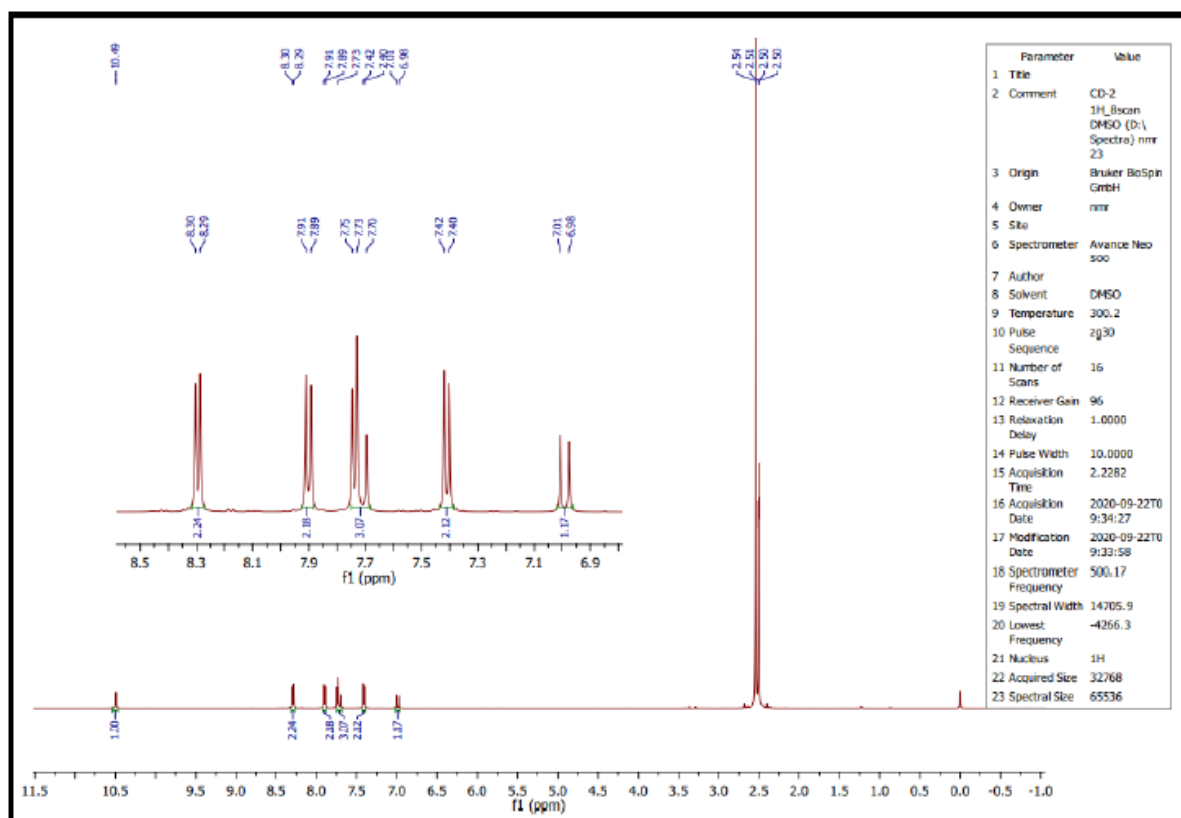

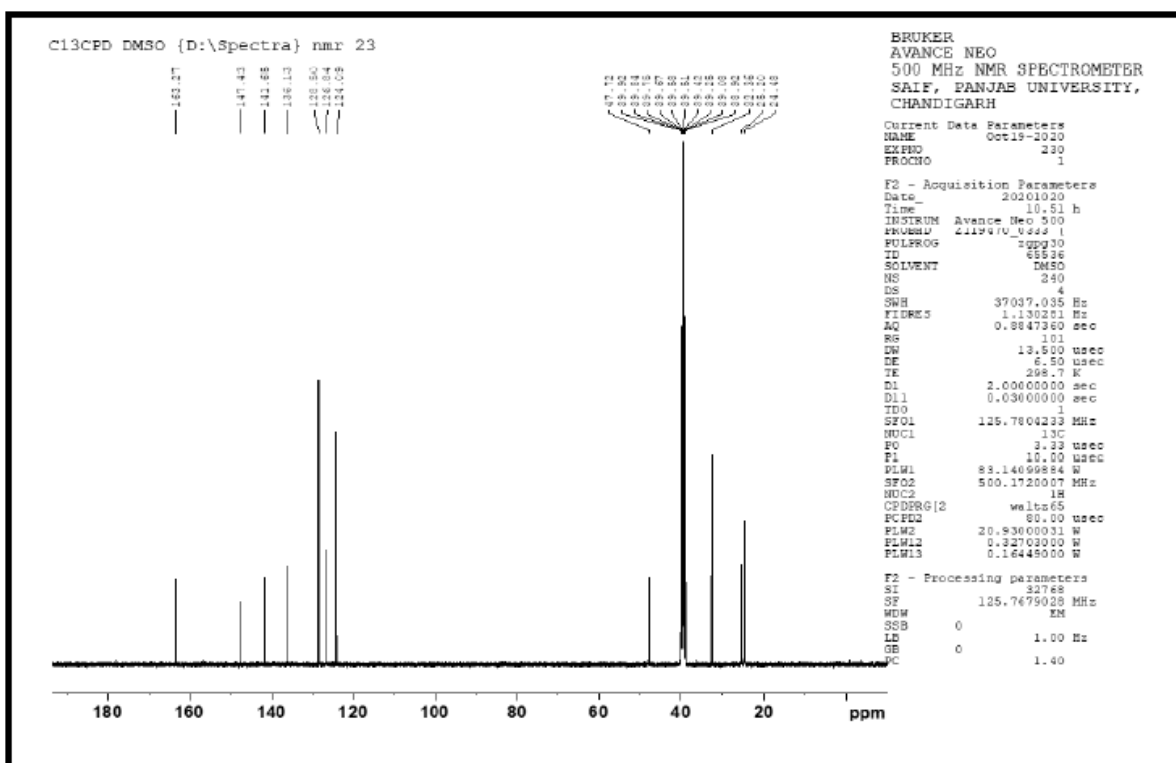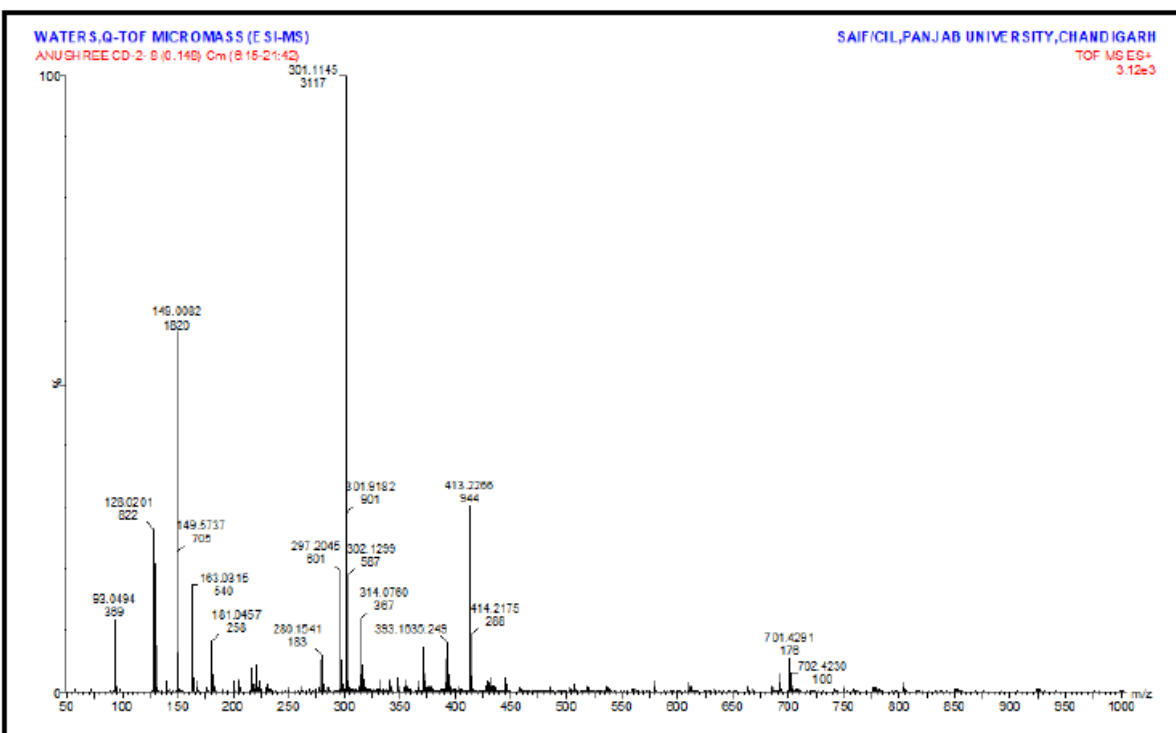

***N*-(4-Fluorophenyl)-3-(4-nitrophenyl)acrylamide (NEA3)**

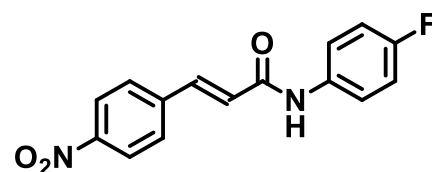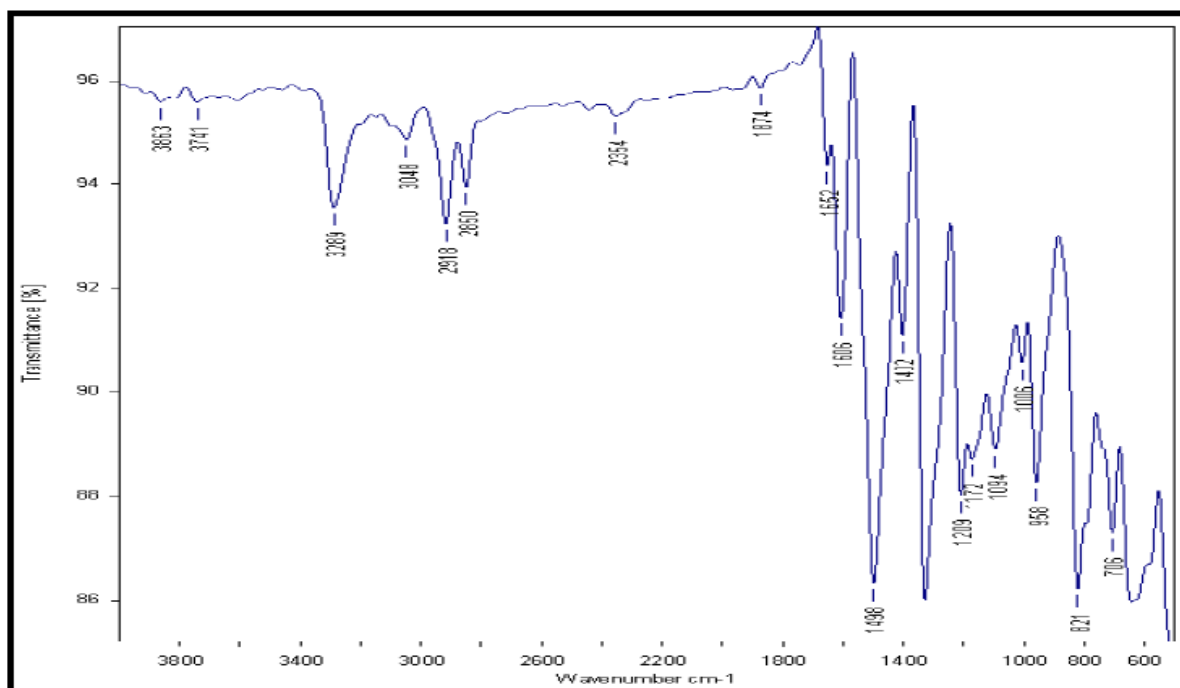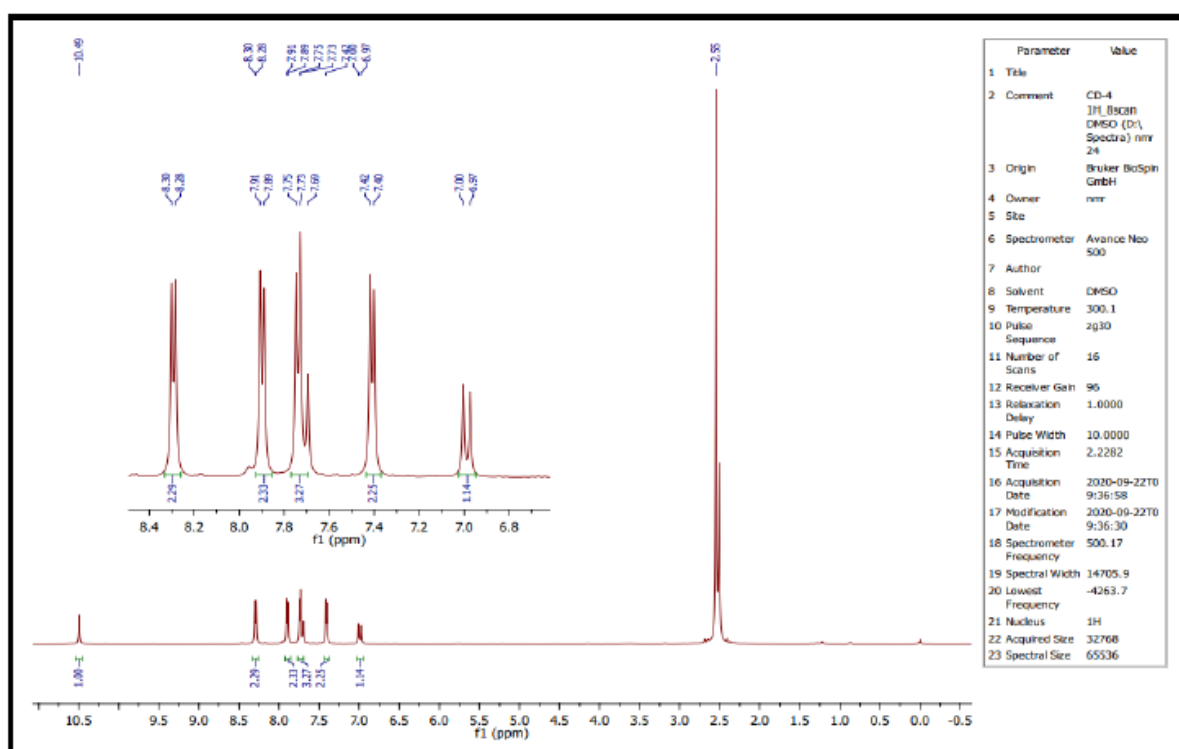

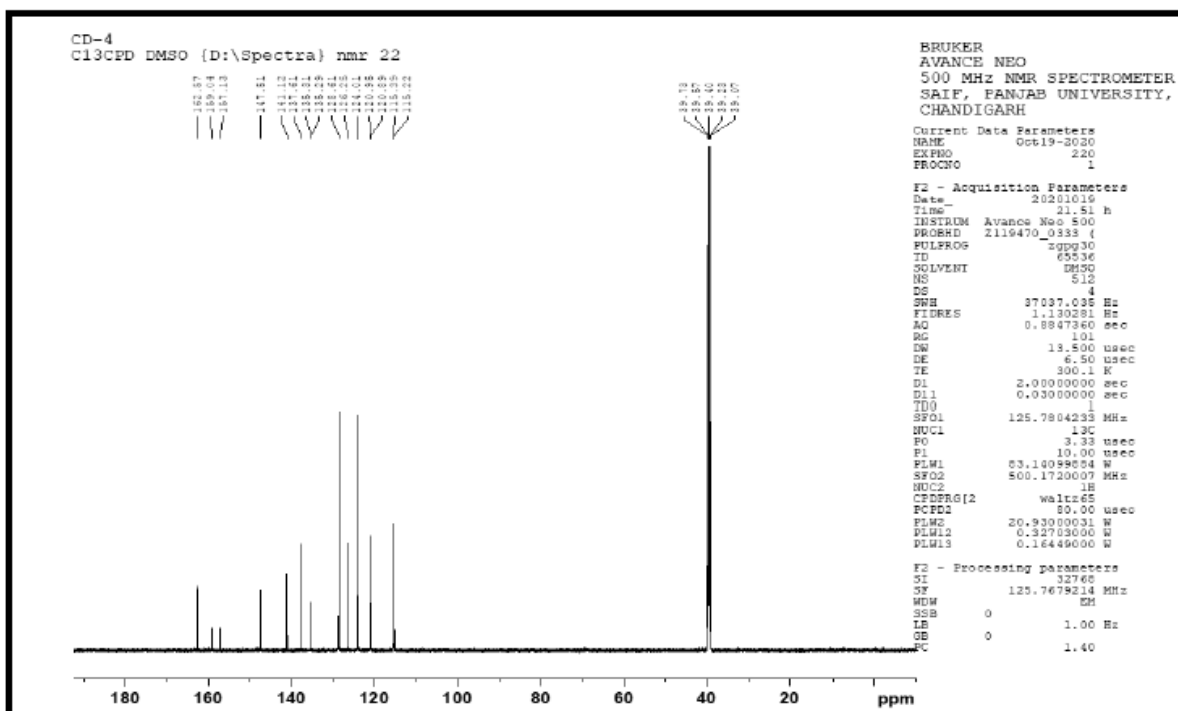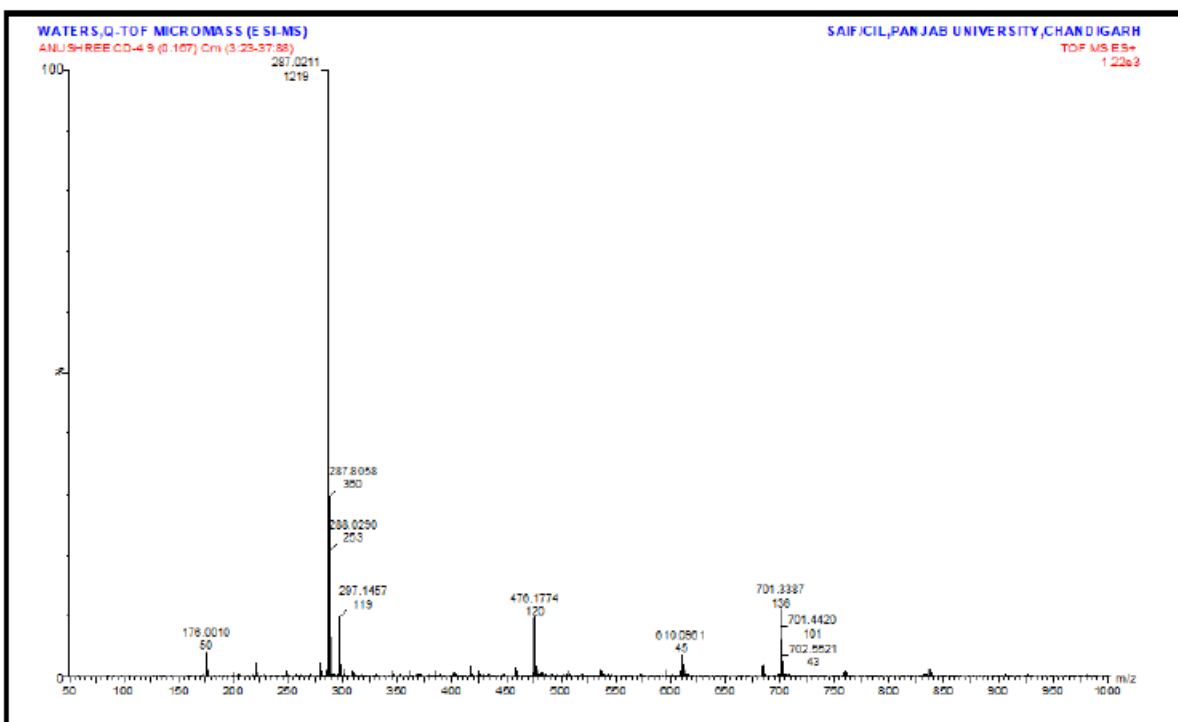

**N-Cyclohexyl-3-(4-nitrophenyl)acrylamide (NEA4)**

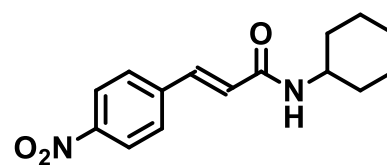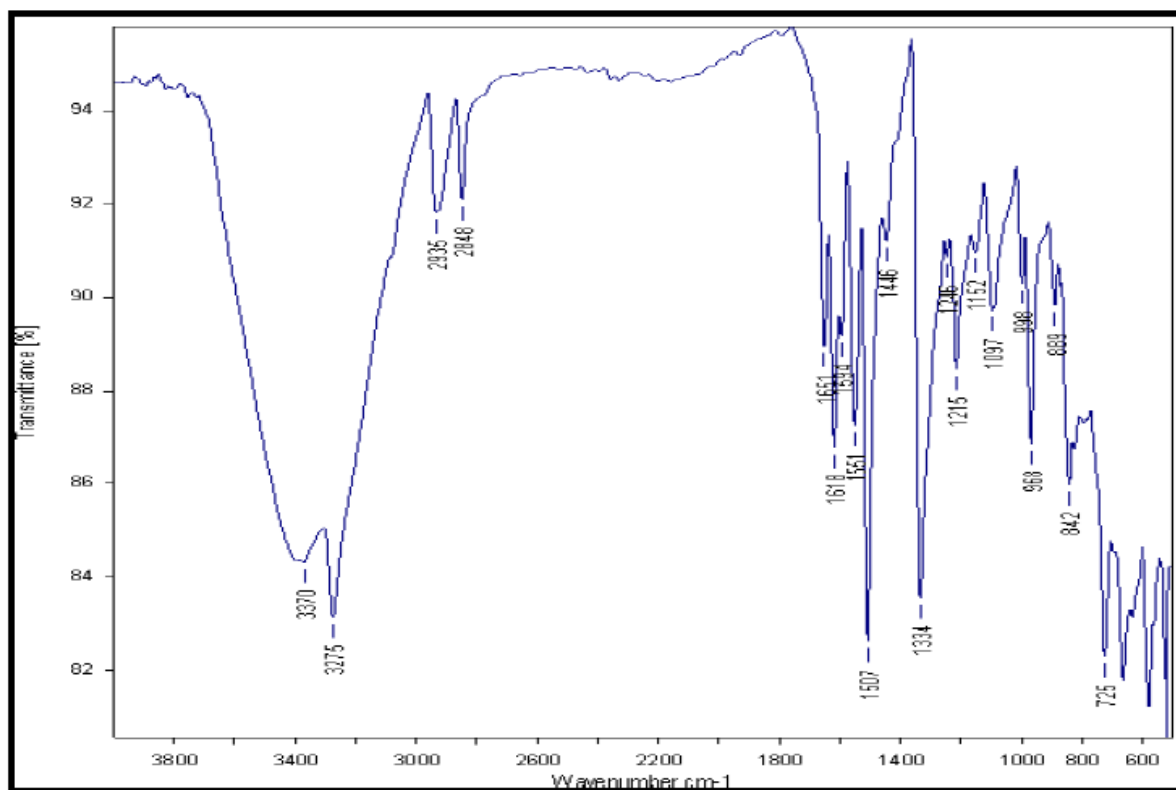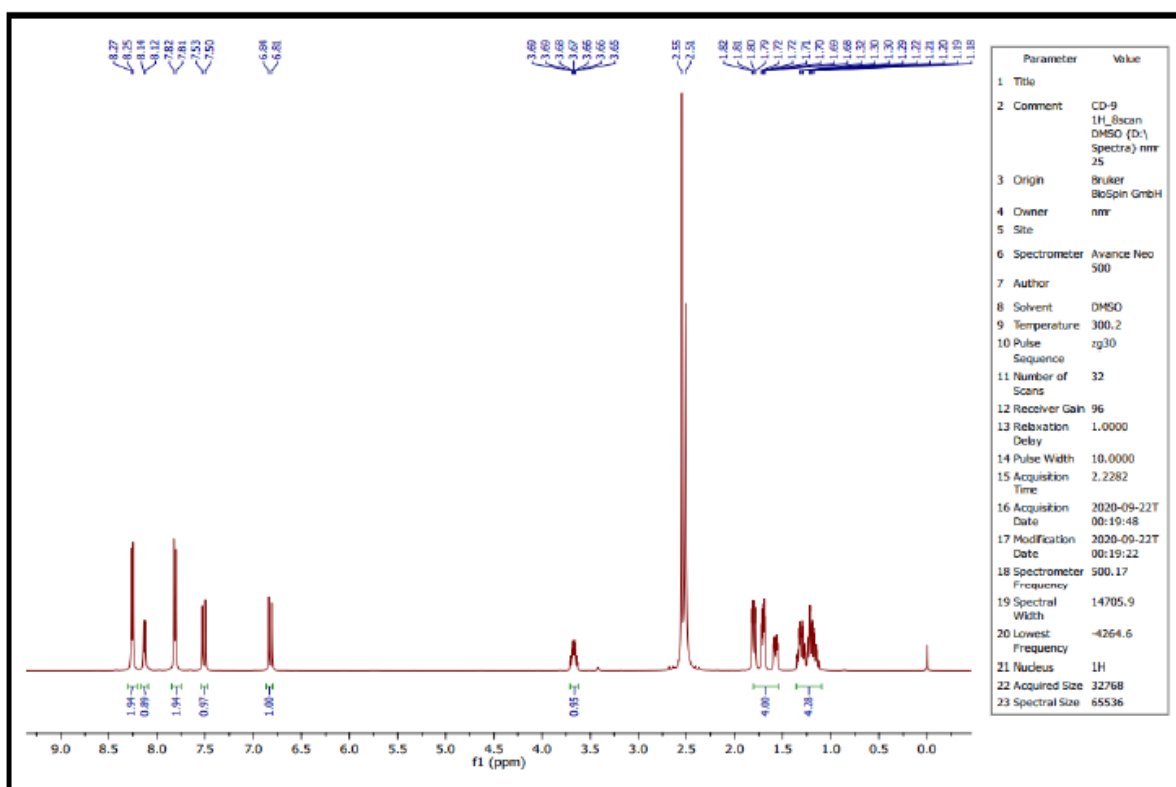



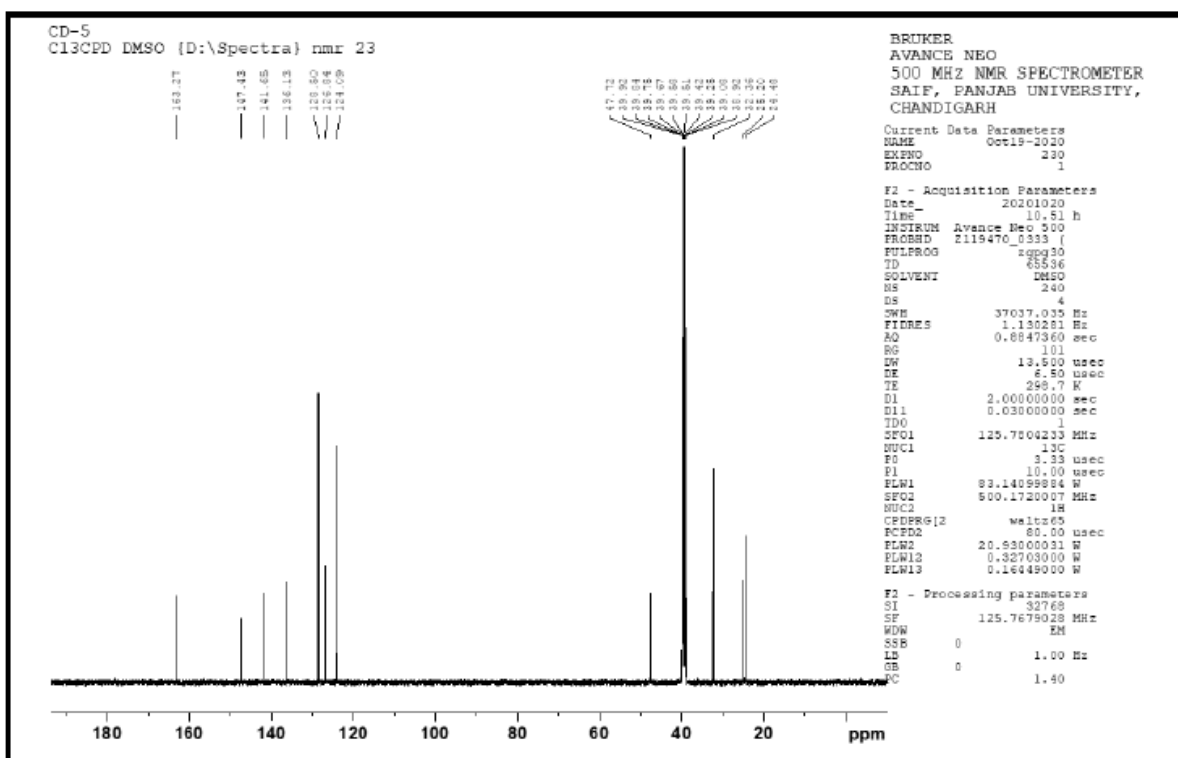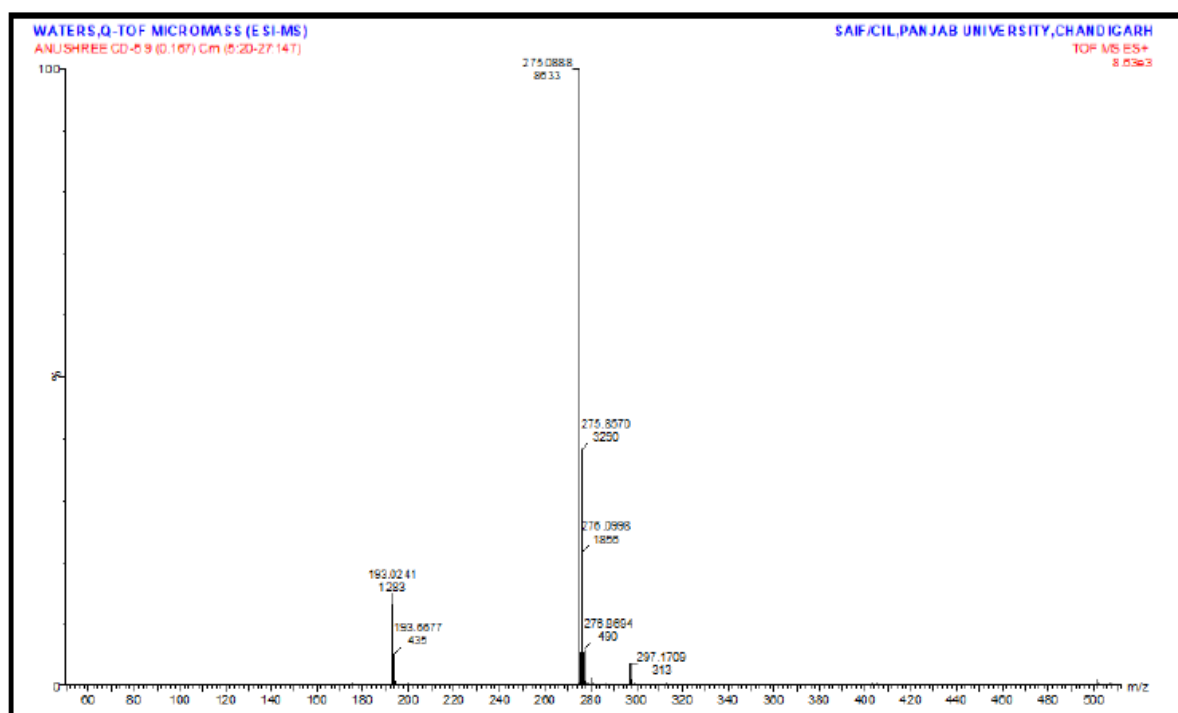



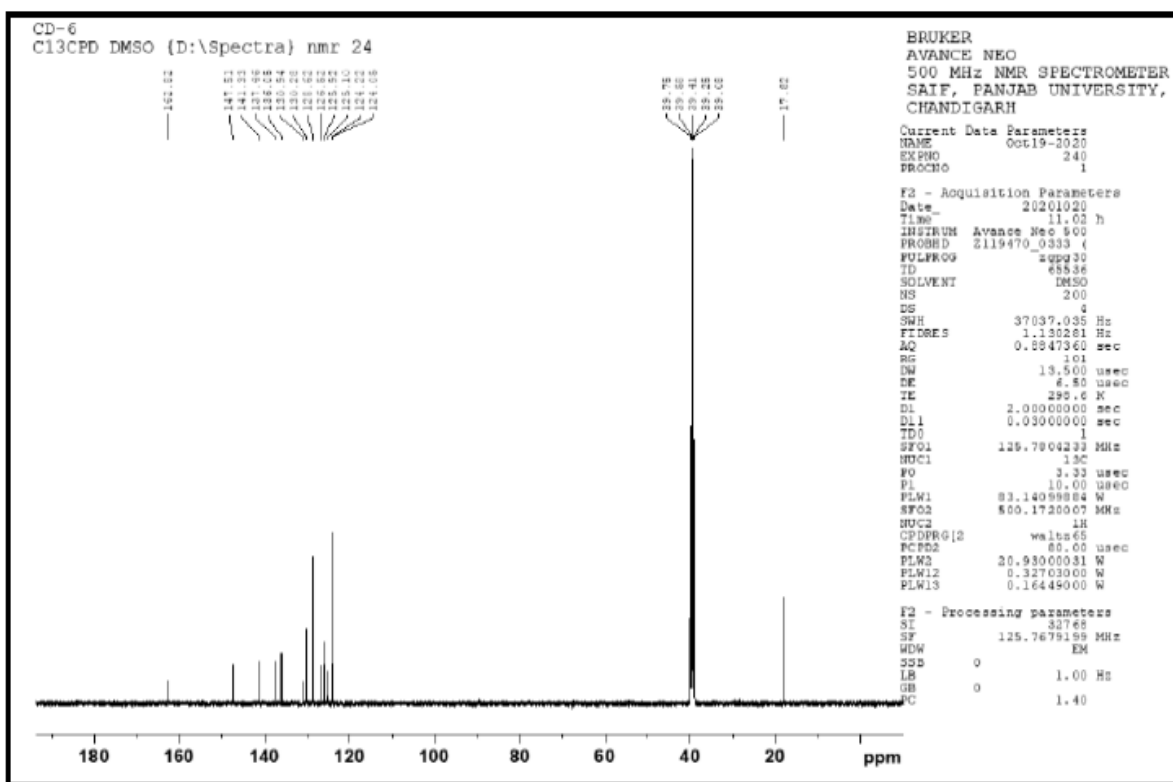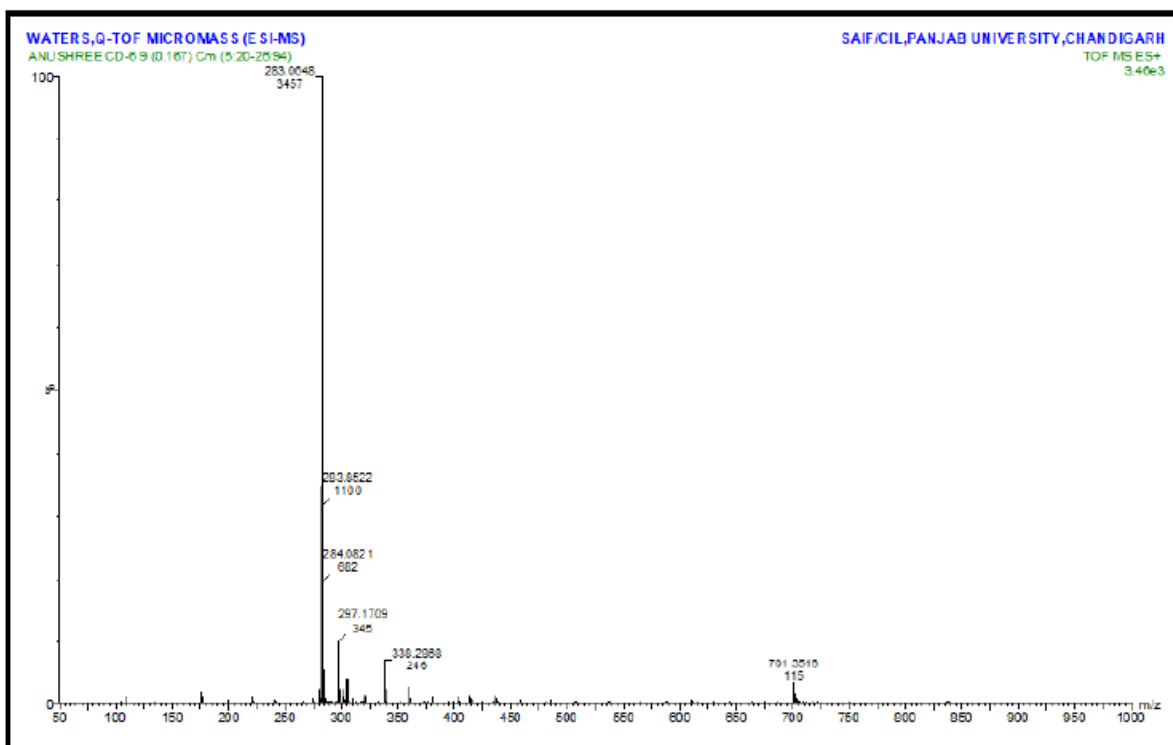

EXPANDED 1H-NMR of NEA4

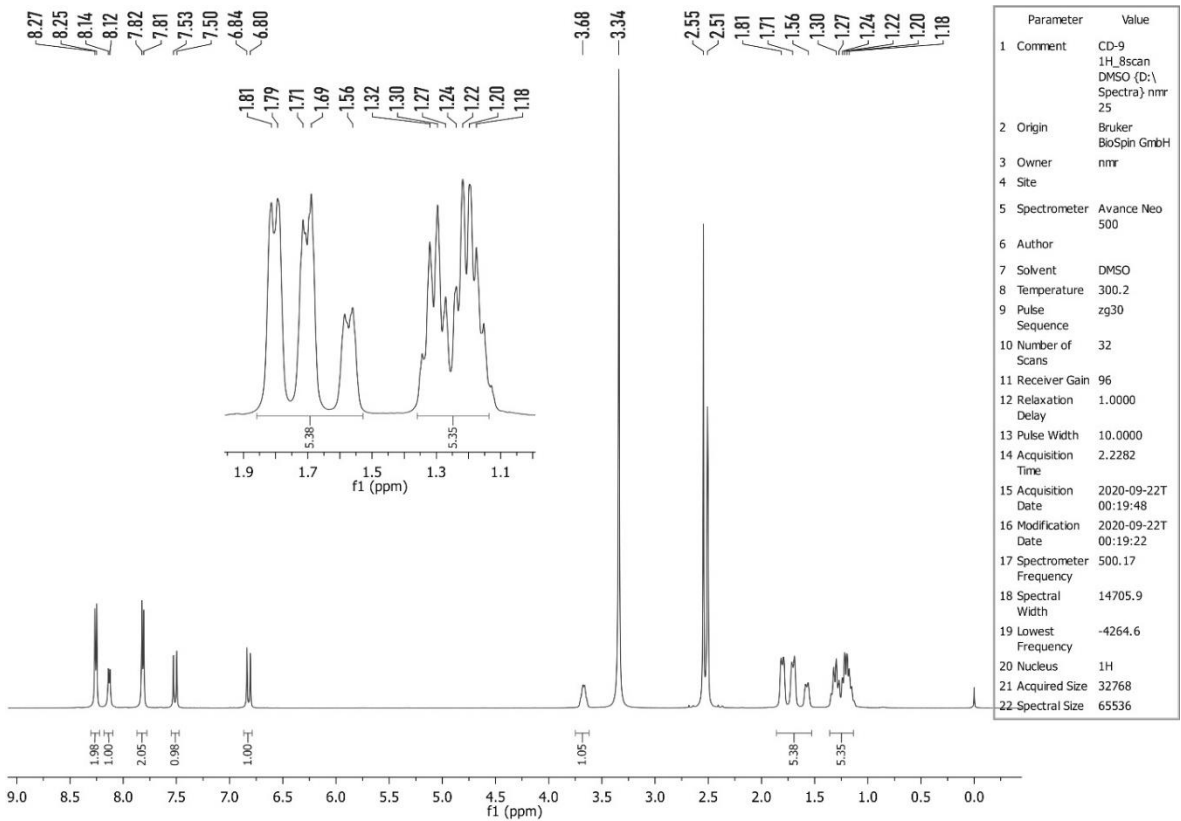

EXPANDED 1H-NMR of NEA5

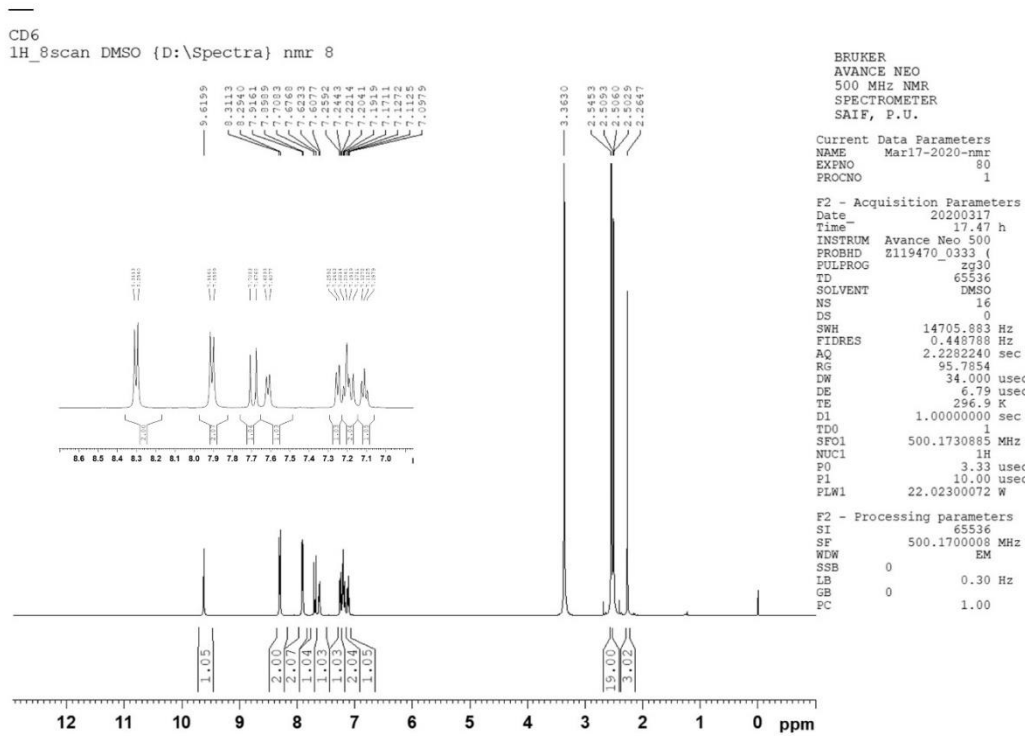

Supplement: s1 [file s1]
